# Supplementary material
Source: publisher figshare collection journal article supplement (https://karger.figshare.com/articles/dataset/_/5241847)
Supplement: Supplementary file 1 [file 1]

---

## Erratum

In the article by Sano et al., entitled 'Two cases of occupational contact urticaria caused by percutaneous sensitization to parvalbumin' [Case Rep Dermatol 2015;7:227–232, DOI: 10.1159/000439080], one of the corresponding author's titles needs to be omitted: Akiyo Sano does not hold the title PhD.
